# Supplementary material for: How To Record a Million Synaptic Weights in a Hippocampal Slice
Source: PubMed Central journal article supplement (PMC2409153; doi:10.1371/journal.pcbi.1000098), 2008-06-20
Supplement: pcbi.1000098.s002.pdf [file pcbi.1000098.s002.pdf]

### CA3 model constants

All voltages are in V.

EREST -0.07

Membrane parameters:

RM (ohm.m<sup>2</sup>) 1

RA (ohm.m) 1

CM (F/m<sup>2</sup>) 0.01

Spiking threshold -0.02

Absolute refractory period 2 ms

| Compartment name | Length (um) | Diameter (um) |
|------------------|-------------|---------------|
| soma             | 20          | 20            |

### CA1 model constants

All voltages are in V.

EREST -0.06

ENa 0.055

EK -0.075

ECa 0.08

Membrane parameters:

RM (ohm.m<sup>2</sup>) 1

RA (ohm.m) 1

CM (F/m<sup>2</sup>) 0.03

We use the Hodgkin-Huxley form for gating

of a voltage-gated channel:

$g = g_{max} * m^x * h^y$

where m and h are gating variables, and x and y are powers.

m and h obey differential equations of the form:

$dm/dt = m_{alpha} * (1 - m) - m_{beta} * m$

In the equations below, this differential form is assumed for all gates unless stated otherwise.

### Voltage-gated Ca channel

$g = g_{max} * s^2 * r$

|                                                     | A    | B        | C  | D       | F        |
|-----------------------------------------------------|------|----------|----|---------|----------|
| $s_{alpha} = (A + B * x) / (C + \exp((x + D) / F))$ | 1600 | 0        | 1  | -0.005  | -0.01389 |
| $s_{beta} = (A + B * x) / (C + \exp((x + D) / F))$  | 178  | 2.00E+04 | -1 | -0.0089 | 0.005    |

$r_{alpha} = 5 * \exp(-50 * (V + 0.06))$  for  $V > -0.06$

$r_{alpha} = 5$  for  $V < -0.06$

Ca concentration pool (note that units are NOT uM)

$d(\text{conc})/dt = \text{sum}(\text{Ca\_influx}) - \text{conc} / 0.01333$

### K\_AHP

$g = g_{max} * z$

$z_{alpha} = 0.02 * \text{conc}$  for  $\text{conc} < 250$

$z_{alpha} = 10.0$  for  $\text{conc} \geq 250$

$z_{beta} = 1.0 + 0.02 * \text{conc}$  for  $\text{conc} < 250$

$z_{beta} = 11.0$  for  $\text{conc} \geq 250$

### K\_C

$g = g_{max} * x * z$

for  $V < -0.01$ :

$x_{alpha} = \exp(53.872 * (V - \text{EREST}) - 0.66835) / 0.018975$

$x_{beta} = 2000 * \exp((\text{EREST} + 0.0065 - V) / 0.027) - x_{alpha}(V)$

for  $V > -0.01$ :

$x_{alpha} = 2000 * \exp((\text{EREST} + 0.0065 - V) / 0.027)$

$x_{beta} = 0$

The z gate is computed directly from Ca concentration, not

using a differential equation:

For  $\text{Ca} < 125$ :

$z = \text{Ca} * 0.008$

For  $\text{Ca} > 125$

$z = 1$

### Na

$g = g_{max} * m^2 * h$

|                                                     | A      | B        | C  | D      | F      |
|-----------------------------------------------------|--------|----------|----|--------|--------|
| $m_{alpha} = (A + B * x) / (C + \exp((x + D) / F))$ | -15008 | 3.20E+05 | -1 | 0.0469 | -0.004 |
| $m_{beta} = (A + B * x) / (C + \exp((x + D) / F))$  | 5572   | 2.80E+05 | -1 | 0.0199 | 0.005  |
| $h_{alpha} = (A + B * x) / (C + \exp((x + D) / F))$ | 128    | 0        | 0  | 0.043  | 0.018  |
| $h_{beta} = (A + B * x) / (C + \exp((x + D) / F))$  | 4000   | 0        | 1  | 0.02   | -0.005 |

### K\_DR

$g = g_{max} * n$

|                                                     | A      | B         | C  | D      | F      |
|-----------------------------------------------------|--------|-----------|----|--------|--------|
| $m_{alpha} = (A + B * x) / (C + \exp((x + D) / F))$ | -398.4 | -1.60E+04 | -1 | 0.0249 | -0.005 |
| $m_{beta} = (A + B * x) / (C + \exp((x + D) / F))$  | 250    | 0         | 0  | 0.04   | 0.04   |

**GluR channel**                       $\tau_1$                        $\tau_1$   
 $g_{syn}(t) = (A \cdot g_{max} / (\tau_1 - \tau_2)) \cdot (\exp(-t/\tau_1) - \exp(-t/\tau_2))$                       2 ms                      9 ms  
A is a normalization constant obtained as follows:  
 $\tau_{pk} = \tau_1 * \tau_2 * \ln(\tau_1 / \tau_2) / (\tau_1 - \tau_2)$   
 $A = (\tau_1 - \tau_2) / (\tau_1 * \tau_2 * \exp(-\tau_{pk} / \tau_1) - \exp(-\tau_{pk} / \tau_2))$

**NMDAR channel: conductance term**  
 $g_{syn}(t) = Block \cdot (A \cdot g_{max} / (\tau_1 - \tau_2)) \cdot (\exp(-t/\tau_1) - \exp(-t/\tau_2))$                       20 ms                      40 ms  
NMDAR channel: Mg block term  
Block =  $1/\eta * (1/\eta - [Mg] * \exp(-V * \gamma))$                        $\eta$                        $\gamma$                       [Mg]  
0.28                      62                      1.2

NMDAR channel: Ca influx term. This is computed separately from the conductance term using identical equations but using  $E_{Ca} = 0.1$  V which differs from the current reversal potential. We assume that Ca carries 1/10 of the NMDA channel conductance.

**Cell model compartmental structure**

| Compartment name and type | Length (um) | Diameter (um) | Channel densities (Ohm <sup>1</sup> /m <sup>2</sup> ) |       |     |         |     |      |    |
|---------------------------|-------------|---------------|-------------------------------------------------------|-------|-----|---------|-----|------|----|
|                           |             |               | Ca                                                    | K_AHP | K_C | Na_K_DR | Glu | NMDA |    |
| Apical_19:                | 120         | 5.78          | 0                                                     | 0     | 0   | 0       | 0   | 10   | 4  |
| Apical_18:                | 120         | 5.78          | 50                                                    | 8     | 50  | 0       | 0   | 10   | 6  |
| Apical_17:                | 120         | 5.78          | 50                                                    | 8     | 50  | 0       | 0   | 10   | 8  |
| Apical_16:                | 120         | 5.78          | 50                                                    | 8     | 50  | 0       | 0   | 10   | 8  |
| Apical_15:                | 120         | 5.78          | 70                                                    | 8     | 50  | 0       | 0   | 10   | 8  |
| Apical_14:                | 120         | 5.78          | 70                                                    | 8     | 50  | 0       | 0   | 10   | 10 |
| Apical_13:                | 120         | 5.78          | 70                                                    | 8     | 50  | 0       | 0   | 10   | 10 |
| Apical_12:                | 120         | 5.78          | 170                                                   | 8     | 150 | 200     | 200 | 10   | 10 |
| Apical_11:                | 120         | 5.78          | 50                                                    | 8     | 50  | 0       | 50  | 10   | 10 |
| Apical_10:                | 120         | 5.78          | 80                                                    | 8     | 200 | 150     | 100 | 10   | 10 |
| Soma:                     | 125         | 8.46          | 40                                                    | 8     | 100 | 300     | 250 | 12   | 0  |
| Basal_8                   | 110         | 4.84          | 80                                                    | 8     | 200 | 150     | 100 | 10   | 0  |
| Basal_7                   | 110         | 4.84          | 50                                                    | 8     | 50  | 0       | 50  | 10   | 0  |
| Basal_6                   | 110         | 4.84          | 120                                                   | 8     | 100 | 200     | 200 | 10   | 0  |
| Basal_5                   | 110         | 4.84          | 70                                                    | 8     | 50  | 0       | 0   | 10   | 0  |
| Basal_4                   | 110         | 4.84          | 70                                                    | 8     | 50  | 0       | 0   | 10   | 0  |
| Basal_3                   | 110         | 4.84          | 50                                                    | 8     | 50  | 0       | 0   | 10   | 0  |
| Basal_2                   | 110         | 4.84          | 50                                                    | 8     | 50  | 0       | 0   | 10   | 0  |
| Basal_1                   | 110         | 4.84          | 0                                                     | 0     | 0   | 0       | 0   | 10   | 0  |
